# Supplementary material for: The effect of one additional driver mutation on tumor progression
Source: PubMed Central journal article supplement (PMC3567469; doi:10.1111/eva.12020), 2012-12-10
Supplement: eva0006-0034-SD1.pdf [file eva0006-0034-SD1.pdf]

## Appendix to

# The effect of one additional driver mutation on tumor progression

Johannes G. Reiter, Ivana Bozic, Benjamin Allen, Krishnendu Chatterjee  
& Martin A. Nowak

## S1 Supplementary results

|       |       | Probability of detection after |          |          |          |          |          |
|-------|-------|--------------------------------|----------|----------|----------|----------|----------|
| $s_0$ | $s_1$ | 5 years                        | 10 years | 20 years | 30 years | 40 years | 50 years |
| 0.002 | 0.002 | 0.0                            | 0.0      | 0.0      | 0.0      | 0.0      | 0.0      |
|       | 0.004 | 0.0                            | 0.0      | 0.0      | 0.0      | 0.0      | 0.0      |
|       | 0.008 | 0.0                            | 0.0      | 0.0      | 0.0      | 0.0      | 0.003    |
| 0.004 | 0.004 | 0.0                            | 0.0      | 0.0      | 0.026    | 0.973    | 1.0      |
|       | 0.008 | 0.0                            | 0.0      | 0.0      | 0.026    | 0.973    | 1.0      |
|       | 0.016 | 0.0                            | 0.0      | 0.0      | 0.04     | 0.974    | 1.0      |
| 0.01  | 0.01  | 0.0                            | 0.0      | 0.999    | 1.0      | 1.0      | 1.0      |
|       | 0.02  | 0.0                            | 0.0      | 0.999    | 1.0      | 1.0      | 1.0      |
|       | 0.04  | 0.0                            | 0.0      | 1.0      | 1.0      | 1.0      | 1.0      |
| 0.02  | 0.02  | 0.0                            | 0.999    | 1.0      | 1.0      | 1.0      | 1.0      |
|       | 0.04  | 0.0                            | 0.999    | 1.0      | 1.0      | 1.0      | 1.0      |
|       | 0.08  | 0.0                            | 0.999    | 1.0      | 1.0      | 1.0      | 1.0      |
| 0.04  | 0.04  | 0.997                          | 1.0      | 1.0      | 1.0      | 1.0      | 1.0      |
|       | 0.08  | 0.997                          | 1.0      | 1.0      | 1.0      | 1.0      | 1.0      |
|       | 0.16  | 0.997                          | 1.0      | 1.0      | 1.0      | 1.0      | 1.0      |

**Table S1: Probability of tumor detection over time in the exponential growth model when there are only a few drivers.** The birth probability of the resident and mutant cells are given by  $\frac{1}{2}(1 + s_0)$  and  $\frac{1}{2}(1 + s_1)$ , respectively. A higher growth coefficient of the mutant,  $s_1$ , can accelerate tumor progression. When  $s_0 = s_1$ , the detection time is independent of the mutation rate. The simulation results are averages over  $10^7$  runs. Parameter values: detection size  $M = 10^9$  cells, driver mutation rate  $u = 10^{-9}$ , average cell division time is 3 days. (The value 0.0 corresponds to a probability below  $10^{-3}$ .)

| Probability of detection after |       |         |          |          |          |          |          |
|--------------------------------|-------|---------|----------|----------|----------|----------|----------|
| $s_0$                          | $s_1$ | 5 years | 10 years | 20 years | 30 years | 40 years | 50 years |
|                                | 0.002 | 0.0     | 0.0      | 0.0      | 0.0      | 0.0      | 0.0      |
| 0.002                          | 0.004 | 0.0     | 0.0      | 0.0      | 0.0      | 0.022    | 0.283    |
|                                | 0.008 | 0.0     | 0.0      | 0.009    | 0.176    | 0.738    | 0.972    |
| 0.004                          | 0.004 | 0.0     | 0.0      | 0.0      | 0.026    | 0.973    | 1.0      |
|                                | 0.008 | 0.0     | 0.0      | 0.007    | 0.661    | 0.997    | 1.0      |
|                                | 0.016 | 0.0     | 0.003    | 0.521    | 0.994    | 1.0      | 1.0      |
| 0.01                           | 0.01  | 0.0     | 0.0      | 0.999    | 1.0      | 1.0      | 1.0      |
|                                | 0.02  | 0.0     | 0.024    | 1.0      | 1.0      | 1.0      | 1.0      |
|                                | 0.04  | 0.006   | 0.056    | 1.0      | 1.0      | 1.0      | 1.0      |
| 0.02                           | 0.02  | 0.0     | 0.999    | 1.0      | 1.0      | 1.0      | 1.0      |
|                                | 0.04  | 0.007   | 1.0      | 1.0      | 1.0      | 1.0      | 1.0      |
|                                | 0.08  | 0.563   | 1.0      | 1.0      | 1.0      | 1.0      | 1.0      |
| 0.04                           | 0.04  | 0.997   | 1.0      | 1.0      | 1.0      | 1.0      | 1.0      |
|                                | 0.08  | 0.999   | 1.0      | 1.0      | 1.0      | 1.0      | 1.0      |
|                                | 0.16  | 1.0     | 1.0      | 1.0      | 1.0      | 1.0      | 1.0      |

**Table S2: Probability of tumor detection over time in the exponential growth model.** The birth probability of the resident and mutant cells are given by  $\frac{1}{2}(1 + s_0)$  and  $\frac{1}{2}(1 + s_1)$ , respectively. A higher growth coefficient of the mutant,  $s_1$ , can accelerate tumor progression. When  $s_0 = s_1$ , the detection time is independent of the mutation rate. The simulation results are averages over  $10^7$  runs. Parameter values: detection size  $M = 10^9$  cells, driver mutation rate  $u = 10^{-5}$ , average cell division time is 3 days. (The value 0.0 corresponds to a probability below  $10^{-3}$ .)

| Probability of detection after |       |         |          |          |          |          |          |
|--------------------------------|-------|---------|----------|----------|----------|----------|----------|
| $s_0$                          | $s_1$ | 5 years | 10 years | 20 years | 30 years | 40 years | 50 years |
|                                | 0.002 | 0.0     | 0.0      | 0.0      | 0.0      | 0.0      | 0.0      |
| 0.002                          | 0.004 | 0.0     | 0.0      | 0.0      | 0.002    | 0.840    | 0.996    |
|                                | 0.008 | 0.0     | 0.0      | 0.508    | 0.996    | 1.0      | 1.0      |
| 0.004                          | 0.004 | 0.0     | 0.0      | 0.0      | 0.026    | 0.973    | 1.0      |
|                                | 0.008 | 0.0     | 0.0      | 0.543    | 0.999    | 1.0      | 1.0      |
|                                | 0.016 | 0.0     | 0.215    | 0.999    | 1.0      | 1.0      | 1.0      |
| 0.01                           | 0.01  | 0.0     | 0.0      | 0.999    | 1.0      | 1.0      | 1.0      |
|                                | 0.02  | 0.0     | 0.835    | 1.0      | 1.0      | 1.0      | 1.0      |
|                                | 0.04  | 0.41    | 1.0      | 1.0      | 1.0      | 1.0      | 1.0      |
| 0.02                           | 0.02  | 0.0     | 0.999    | 1.0      | 1.0      | 1.0      | 1.0      |
|                                | 0.04  | 0.544   | 1.0      | 1.0      | 1.0      | 1.0      | 1.0      |
|                                | 0.08  | 0.997   | 1.0      | 1.0      | 1.0      | 1.0      | 1.0      |
| 0.04                           | 0.04  | 0.997   | 1.0      | 1.0      | 1.0      | 1.0      | 1.0      |
|                                | 0.08  | 1.0     | 1.0      | 1.0      | 1.0      | 1.0      | 1.0      |
|                                | 0.16  | 1.0     | 1.0      | 1.0      | 1.0      | 1.0      | 1.0      |

**Table S3: Probability of tumor detection over time in the exponential growth model.** The birth probability of the resident and mutant cells are given by  $\frac{1}{2}(1 + s_0)$  and  $\frac{1}{2}(1 + s_1)$ , respectively. A higher growth coefficient of the mutant,  $s_1$ , can accelerate tumor progression. When  $s_0 = s_1$ , the detection time is independent of the mutation rate. The simulation results are averages over  $10^7$  runs. Parameter values: detection size  $M = 10^9$  cells, driver mutation rate  $u = 10^{-3}$ , average cell division time is 3 days. (The value 0.0 corresponds to a probability below  $10^{-3}$ .)

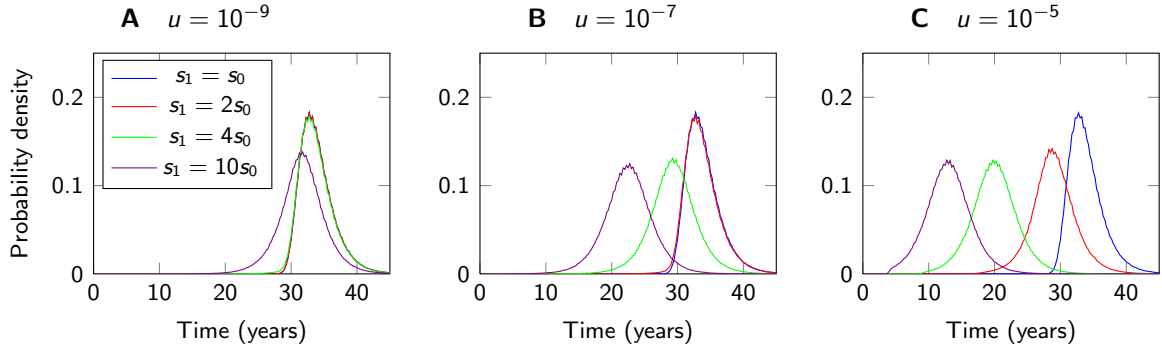

**Fig. S1: Probability density of the tumor detection time in the exponential growth model.** Effect on the distribution of the tumor detection time for different driver mutation rates and growth coefficients of the additional driver mutation. In panel A ( $u = 10^{-9}$ ) only when  $s_1 = 10s_0$  (purple line) tumor progression is significantly accelerated. Otherwise when  $s_1 = 2s_0$  (red line) and  $s_1 = 4s_0$  (red line) there is no effect on the tumor detection time (see panel A). If the mutation rate is increased to  $u = 10^{-5}$  even when  $s_1 = 2s_0$  (red line) affects the detection time (see panel C). The simulation results are averages over  $10^7$  runs. Parameter values: growth coefficient  $s_0 = 0.004$ , tumor detection size  $M = 10^9$ , average cell division time  $T = 3$  days.

|       |        | Probability of detection after |          |          |          |          |          |
|-------|--------|--------------------------------|----------|----------|----------|----------|----------|
| $s_0$ | $K$    | 10 years                       | 20 years | 30 years | 40 years | 50 years | 60 years |
| 0.002 | $10^4$ | 0.0                            | 0.0      | 0.0      | 0.0      | 0.0      | 0.0      |
|       | $10^6$ | 0.0                            | 0.0      | 0.0      | 0.0      | 0.0      | 0.0      |
|       | $10^8$ | 0.0                            | 0.0      | 0.0      | 0.0      | 0.0      | 0.0      |
| 0.004 | $10^4$ | 0.0                            | 0.0      | 0.0      | 0.0      | 0.0      | 0.0      |
|       | $10^6$ | 0.0                            | 0.0      | 0.0      | 0.0      | 0.0      | 0.003    |
|       | $10^8$ | 0.0                            | 0.0      | 0.0      | 0.0      | 0.001    | 0.043    |
| 0.01  | $10^4$ | 0.0                            | 0.0      | 0.0      | 0.0      | 0.0      | 0.001    |
|       | $10^6$ | 0.0                            | 0.0      | 0.008    | 0.02     | 0.032    | 0.044    |
|       | $10^8$ | 0.0                            | 0.0      | 0.332    | 0.798    | 0.94     | 0.982    |
| 0.02  | $10^4$ | 0.0                            | 0.0      | 0.0      | 0.001    | 0.001    | 0.001    |
|       | $10^6$ | 0.0                            | 0.019    | 0.042    | 0.065    | 0.087    | 0.108    |
|       | $10^8$ | 0.0                            | 0.762    | 0.978    | 0.998    | 1.0      | 1.0      |
| 0.04  | $10^4$ | 0.0                            | 0.001    | 0.001    | 0.002    | 0.002    | 0.003    |
|       | $10^6$ | 0.017                          | 0.062    | 0.105    | 0.146    | 0.185    | 0.222    |
|       | $10^8$ | 0.713                          | 0.997    | 1.0      | 1.0      | 1.0      | 1.0      |

**Table S4: Probability of tumor detection over time in the logistic growth model.** The resident cells have a birth probability of  $\frac{1}{2}(1 + s_0(1 - X/k))$  which depends on the current tumor size  $X$ . The birth probability of the mutant cells is constant  $\frac{1}{2}(1 + s_1)$ . If the carrying capacity  $K$  is low but the mutation rate  $u$  is high (more precisely, if  $Ku > s_0/s_1$ ), tumor progression is not decelerated. The simulation results are averages over  $10^7$  runs. Parameter values: growth coefficient  $s_1 = s_0$ , driver mutation rate  $u = 10^{-9}$ , detection size  $M = 10^9$  cells, average cell division time is 3 days. (The value 0.0 corresponds to a probability below  $10^{-3}$ .)

|       |        | Probability of detection after |          |          |          |          |          |
|-------|--------|--------------------------------|----------|----------|----------|----------|----------|
| $s_0$ | $K$    | 10 years                       | 20 years | 30 years | 40 years | 50 years | 60 years |
| 0.002 | $10^4$ | 0.0                            | 0.0      | 0.0      | 0.0      | 0.0      | 0.044    |
|       | $10^6$ | 0.0                            | 0.0      | 0.0      | 0.0      | 0.0      | 0.114    |
|       | $10^8$ | 0.0                            | 0.0      | 0.0      | 0.0      | 0.0      | 0.15     |
| 0.004 | $10^4$ | 0.0                            | 0.0      | 0.001    | 0.919    | 1.0      | 1.0      |
|       | $10^6$ | 0.0                            | 0.0      | 0.003    | 0.962    | 1.0      | 1.0      |
|       | $10^8$ | 0.0                            | 0.0      | 0.009    | 0.968    | 1.0      | 1.0      |
| 0.01  | $10^4$ | 0.0                            | 0.997    | 1.0      | 1.0      | 1.0      | 1.0      |
|       | $10^6$ | 0.0                            | 0.999    | 1.0      | 1.0      | 1.0      | 1.0      |
|       | $10^8$ | 0.0                            | 0.999    | 1.0      | 1.0      | 1.0      | 1.0      |
| 0.02  | $10^4$ | 0.984                          | 1.0      | 1.0      | 1.0      | 1.0      | 1.0      |
|       | $10^6$ | 0.994                          | 1.0      | 1.0      | 1.0      | 1.0      | 1.0      |
|       | $10^8$ | 0.996                          | 1.0      | 1.0      | 1.0      | 1.0      | 1.0      |
| 0.04  | $10^4$ | 1.0                            | 1.0      | 1.0      | 1.0      | 1.0      | 1.0      |
|       | $10^6$ | 1.0                            | 1.0      | 1.0      | 1.0      | 1.0      | 1.0      |
|       | $10^8$ | 1.0                            | 1.0      | 1.0      | 1.0      | 1.0      | 1.0      |

**Table S5: Probability of tumor detection over time in the logistic growth model.** The resident cells have a birth probability of  $\frac{1}{2}(1 + s_0(1 - X/\kappa))$  which depends on the current tumor size  $X$ . The birth probability of the mutant cells is constant  $\frac{1}{2}(1 + s_1)$ . If the carrying capacity  $K$  is low but the mutation rate  $u$  is high (more precisely, if  $Ku > s_0/s_1$ ), tumor progression is not decelerated. The simulation results are averages over  $10^7$  runs. Parameter values: growth coefficient  $s_1 = s_0$ , driver mutation rate  $u = 10^{-3}$ , detection size  $M = 10^9$  cells, average cell division time is 3 days. (The value 0.0 corresponds to a probability below  $10^{-3}$ .)

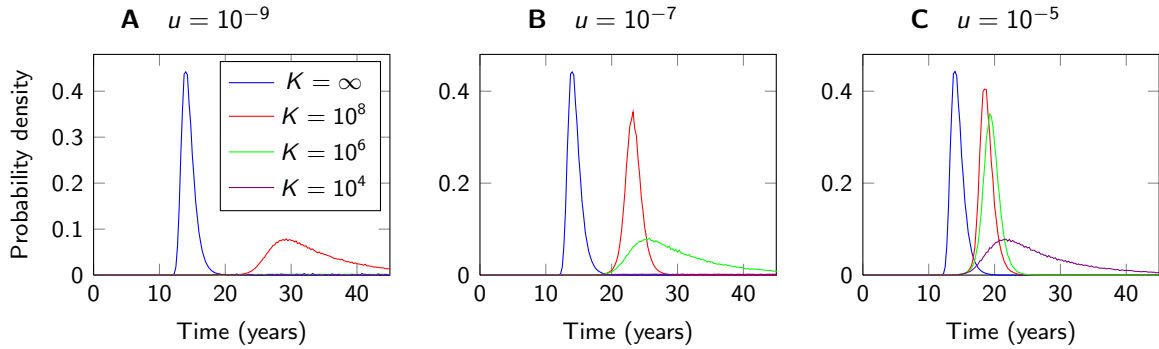

**Fig. S2: Probability density of the tumor detection time in the logistic growth model.** Effect on the distribution of the tumor detection time for different driver mutation rates and carrying capacities of the resident cells. If  $Ku < s_0/s_1$ , the carrying capacity can tremendously decelerate tumor progression. In panel A ( $u = 10^{-9}$ ) no tumor can be detected within 50 years when  $K \leq 10^6$  (green and purple line). The simulation results are averages over  $10^7$  runs. Parameter values: growth coefficient  $s_0 = s_1 = 0.01$ , tumor detection size  $M = 10^9$ , average cell division time  $T = 3$  days.
